1 **The genome of the endangered *Macadamia janseni* displays little diversity but represents an**  
2 **important genetic resource for plant breeding.**

3

4

5 Priyanka Sharma<sup>1</sup>, Valentine Murigneux<sup>2</sup>, Jasmine Haimovitz<sup>3</sup>, Catherine J. Nock<sup>4</sup>, Wei  
6 Tian<sup>5,6</sup>, Ardashir Kharabian Masouleh<sup>1</sup>, Bruce Topp<sup>1</sup>, Mobashwer Alam<sup>1</sup>, Agnelo Furtado<sup>1</sup>  
7 and Robert J. Henry<sup>1,7</sup>

8

9

10 <sup>1</sup> Queensland Alliance for Agriculture and Food Innovation, University of Queensland,  
11 Brisbane 4072 Australia

12 <sup>2</sup> Genome Innovation Hub, University of Queensland, Brisbane 4072 Australia

13 <sup>3</sup> Dovetail Genomics, 100 Enterprise Way, Scotts Valley, CA 95066

14 <sup>4</sup> Southern Cross Plant Science, Southern Cross University, Military Road, NSW, Lismore,  
15 2480, Australia

16

17 <sup>5</sup> BGI-Shenzhen, Shenzhen 518083, China

18 <sup>6</sup> BGI-Australia, 300 Herston Road, Herston QLD 4006, Australia

19 <sup>7</sup> ARC Centre of Excellence for Plant Success in Nature and Agriculture, University of  
20 Queensland, Brisbane 4072 Australia

## 21 **Summary**

22 Macadamia, a recently domesticated expanding nut crop in the tropical and subtropical regions  
23 of the world, is one of the most economically important genera in the diverse and widely  
24 adapted Proteaceae family. All four species of *Macadamia* are rare in the wild with the most  
25 recently discovered, *M. jansanii*, being endangered. The *M. jansanii* genome has been used as  
26 a model for testing sequencing methods using a wide range of long read sequencing techniques.  
27 Here we report a chromosome level genome assembly, generated using a combination of  
28 Pacific Biosciences sequencing and Hi-C, comprising 14 pseudo-molecules, with a N50 of 58  
29 Mb and a total 758 Mb genome assembly size of which 56% is repetitive. Completeness  
30 assessment revealed that the assembly covered 96.9% of the conserved single copy genes.  
31 Annotation predicted 31,591 protein coding genes and allowed the characterization of genes  
32 encoding biosynthesis of cyanogenic glycosides, fatty acid metabolism and anti-microbial  
33 proteins. Re-sequencing of seven other genotypes confirmed low diversity and low  
34 heterozygosity within this endangered species. Important morphological characteristics of this  
35 species such as small tree size and high kernel recovery suggest that *M. jansanii* is an important  
36 source of these commercial traits for breeding. As a member of a small group of families that  
37 are sister to the core eudicots, this high-quality genome also provides a key resource for  
38 evolutionary and comparative genomics studies.

39

40 **Key words:** Proteaceae, endangered species, genome sequencing, genome assembly, genome  
41 diversity, wild species.

## 42 **Introduction:**

43 Macadamia is a recent domesticate with a complex domestication history (Peace, 2005). The  
44 four currently recognised *Macadamia* species are endemic to the central coast of eastern  
45 Australia (Mast et al., 2008). However, macadamia was first domesticated in Hawaii around  
46 100 years ago, with most of the global production based upon the Hawaiian domesticated  
47 germplasm (Hardner, 2016). Macadamia is a member of the Proteaceae family, one of a group  
48 of families that are a sister to the core eudicots (Gross and Weston, 1992; Christenhusz and  
49 Byng, 2016). Macadamia is the first Australian native plant that has been widely grown as a  
50 food plant (Peace et al., 2013). All of the Hawaiian macadamia cultivars has been reported to  
51 be based upon only a few or possibly even a single tree from Australia (Nock et al., 2019). This  
52 resulting narrow gene pool makes it susceptible to disease and climate change, whereas the  
53 unexploited wild macadamia germplasm of Australia provides an opportunity for great  
54 improvement of this newly domesticated crop. Despite a rapid international increase in  
55 macadamia production, breeding is restricted because of lack of genomic information (Topp et  
56 al., 2019).

57 Macadamia is the most widely grown Australian native food crop (Peace et al., 2013).  
58 Macadamia production was valued at USD 1.17 billion in 2019 and production is expected to  
59 grow at a rate of 9.2% from 2020 to 2027 ([https://www.grandviewresearch.com/industry-](https://www.grandviewresearch.com/industry-analysis/macadamia-nut-market)  
60 [analysis/macadamia-nut-market](https://www.grandviewresearch.com/industry-analysis/macadamia-nut-market)). Among the macadamia species, *M. integrifolia*, the species  
61 from which most of the domesticated gene pool is derived (Hardner, 2016), was the first  
62 genome to be sequenced (Nock et al., 2016). This genome, of cultivar HAES 741, has  
63 supported initial efforts at genome based breeding (O'Connor et al., 2018) and has recently  
64 been upgraded to chromosome level with a contig N50 of 413 Kb. The other species that has  
65 been a contributor to domesticated germplasm, *M. tetraphylla*, has been sequenced with an  
66 N50 of 1.18 Mb (Niu et al., 2020).

67 All species are rare in the wild but *M. jansanii* is endangered and is only found in a limited area  
68 to the north-west of Bundaberg, Queensland (Shapcott and Powell, 2011; Hayward et al.,  
69 2021). *Macadamia jansanii* is endangered under the Australian (EPBC) Act and critically  
70 endangered under the Queensland (Qld Nature Conservation Act) legislation (Gross and  
71 Weston, 1992). Due to the expected low heterozygosity associated with the extremely small  
72 population size, this species has been used as a model to compare available genome sequencing  
73 technologies (Murigneux et al., 2020; Sharma et al., 2021). *Macadamia jansanii* has been  
74 sequenced (Murigneux et al., 2020), using three long read sequencing technologies, Oxford  
75 Nanopore (PromethION), PacBio (Sequel I) and BGI (Single-tube Long Fragment Read). The  
76 genome was recently updated by sequencing using the PacBio HiFi sequencing (Sharma et al.,  
77 2021). Here, we report chromosome level assembly of the same genotype using Hi-C and  
78 annotation of the genome. This provides a platform that allows analysis of key genes of  
79 importance in macadamia breeding, a reference genome in this group of angiosperms and  
80 insights into the impact of rarity on plant genomes.

81 This high quality reference genome also provides a platform for analysis of three unique  
82 attributes of macadamia, the high levels of unusual fatty acids (Hu et al., 2019b), high  
83 cyanogenic glucoside content, (Nock et al., 2016) and the presence of a novel anti-microbial  
84 peptide (Marcus et al., 1999). The fatty acid, palmitoleic acid (16:1) is found in large amounts  
85 in macadamia and has been considered to have potential human health benefits (Solà Marsiñach  
86 and Cuenca, 2019; Song et al., 2018). Cyanogenic glycosides in plants are part of their defence  
87 against herbivores. However, the highly bitter nuts of *M. jansanii* are not edible and use of this  
88 species in macadamia breeding will require selection to ensure high levels of cyanogenic  
89 glycosides are avoided. Identification of the associated genes could assist by providing  
90 molecular tools for use in breeding selection. A novel antimicrobial protein was reported in  
91 the kernels of *M. integrifolia* (Marcus et al., 1999). These small antimicrobial proteins were

92 found to be produced by processing of a larger pre-cursor protein. As fungal infection and  
93 insect herbivores are major hurdles in macadamia production (Dahler et al., 1995; Nock et al.,  
94 2016; Marcus et al., 1999), retention of the antimicrobial protein and cyanogenesis in some  
95 parts of the plant may be important. Analysis of candidate genes for these traits may assist in  
96 understanding and manipulating in macadamia breeding.

## 97 **Results**

### 98 **Genome sequencing and assembly**

99 A pseudo-molecule level genome assembly of Pac Bio contigs (Murigneux et al., 2020) was  
100 produced using Hi-C. The estimated genome size of *M. jansanii* was 780 Mb (Murigneux et  
101 al., 2020) and the size of the final Hi-C assembly is 758 Mb comprised of 219 scaffolds with  
102 an N50 of 52Mb (**Table 1**). Of this 97% was anchored to the 14 largest scaffolds representing  
103 the 14 chromosomes (**Figure S1, Table S1**). Comparison of the PacBio assembly with the Hi-  
104 C chromosome assembly shows the number of scaffolds decreased from 762 to 219 and the  
105 length of the longest scaffold increased 6-fold (**Table 1**). The L50 reduced from 135 to 7  
106 scaffolds and the N50 was improved from 1.58 Mb to 52 Mb.

### 107 **Assembly completeness and repeat element analysis**

108 The completeness of the *M. jansanii* assembly was assessed by Benchmarking Universal  
109 Single-Copy orthologs (BUSCO) (Simão et al., 2015). This analysis revealed 96.9% complete  
110 genes (single and duplicated) in the Hi-C assembly (**Table 1**). A total of 423.6 Mb, representing  
111 55.9% of the Hi-C assembly was identified as repetitive (**Table 2**). Class I TE (Transposable  
112 Elements) repeats were the most abundant repetitive elements representing 30% of the genome,  
113 including LTRs (24%), LINE (5.67%) and SINE (0%) and Class II TE repeats were 1.56%.

114

## 115 **Structural and functional annotation**

116 A total of 31,591 genes were identified in the repeat-masked Hi-C *M. jansanii* genome using  
117 an homology-based and RNA assisted approach. The average length of the genes was 1,368 bp  
118 (**Table 3**). Of a total of 31,591 transcripts, only 22,500 sequences (71%) were annotated by  
119 BLAST2GO (**Figure S2**). The transcripts were functionally annotated using Gene Ontology  
120 (GO) terms to assess the potential role of the genes in the *M. jansanii* genome. The most  
121 abundant *M. jansanii* specific gene families were organic cyclic and heterocyclic compound  
122 among the molecular function; organic and cellular metabolic among the biological process;  
123 and protein-containing binding membrane and intracellular organelle among the cellular  
124 component (**Figure S3**). The comparison of the three *Macadamia* genomes, assembled so far,  
125 showed *M. jansanii* has the highly continuous assembly with highest number of BUSCO genes  
126 (**Table 4**).

## 127 **Anti-microbial genes**

128 Antimicrobial proteins have been reported in *M. integrifolia* (Marcus et al., 1999). In addition  
129 to antimicrobial properties these seed storage proteins are homologous to vicilin 7S globulins  
130 and have been identified as putative allergens (Rost et al., 2020; Rost et al., 2016). A cDNA  
131 sequence, from *M. integrifolia*, encoding these proteins, MiAMP-2, has been reported to  
132 contain four repeat segments, with each segment comprised of cysteine rich motifs (C-X-X-X-  
133 C-(10 to12) X-C-X-X-X-C), where X is any other amino acid residue (Marcus et al., 1999).  
134 Blast analysis identified homologues in the *M. jansanii* genome (**Figure S4**). The ANN01396  
135 transcript from *M. jansanii*, also showed four repeat segments of cysteine motifs with the same  
136 structure as found in MiAMP-2 (**Figure 1A**). Comparison of the translated protein sequences  
137 indicated a high level of homology with only 28 differences in the 665 aa sequence (**Figure**

138 **1B).** The *M. jansanii* sequence provides the first genomic sequence for this novel anti-microbial  
139 gene and reveals the presence of an intron in the 5' UTR (**Figure S5**).

#### 140 **Cyanogenic glycoside genes**

141 *M. jansanii* has bitter nuts, presumably because of the presence of cyanogenic glycosides (Nock  
142 et al., 2016; Castada et al., 2020). Analysis of genes of cyanogenic glycoside metabolism  
143 detected a total of 76 putative genes in the *M. jansanii* genome. These genes were distributed  
144 throughout the genome (**Figure 2(A)**). The largest number of these genes (22) are encoded by  
145 UGT85 which is responsible for conversion of Hydronitrile to cyanogenic glucoside. In  
146 contrast only 14 genes for Cyp 79, the first gene in the pathway, was found (**Figure 2(B) &**  
147 **Table S8**).

#### 148 **Fatty acid metabolism genes**

149 This study identified the key enzymes involved in fatty acid biosynthesis: elongases (e.g., KAS,  
150 FATA, FATB) and desaturases (e.g., SAD). A total of 44 of these genes were found in the *M.*  
151 *jansanii* genome. Stearoyl-ACP desaturases (SAD) which convert 18:0 to 18:1 was found to  
152 be abundant with 17 genes present (**Figure 2(A) & Table S7**).

153

#### 154 **Heterozygosity and genetic diversity**

155 To study the genetic diversity within the species, re-sequencing of seven other individuals was  
156 performed. A total of 166 M to 167 M reads of 150 bp in length were obtained. This represents  
157 a coverage of around 32 X of the *M. jansanii* genome. The seven accessions analysed had  
158 between 5.4 and 7.0 million variants relative to the reference genome (Table 5). Most of these  
159 were SNPs with less than 600,000 indels in all genotypes. Most SNPs were heterozygous with  
160 approximately 1 million or less homozygous SNP variants in each individual. The level of SNP

161 heterozygosity for the 8 genotypes (including the reference) was found to be in the range of  
162 0.26% to 0.34% with an average of 0.31 % (Table 5). The genotypes varied in their divergence  
163 from the reference with most unique variants being heterozygous and only 85,000 to 165,00  
164 unique homozygous SNPs being found in an individual and not present in the other seven  
165 genotypes.

166

## 167 **Discussion**

168 A major constraint to the use of *M. jansanii* for commercial breeding is the risk of an inedible  
169 kernel due to high levels of toxic cyanogenic glycosides. Cyanogenic glycosides have been  
170 observed in all the four species of *Macadamia*. However, the concentration varies at different  
171 developmental stages (Castada et al., 2020). Even the edible cultivars derived from *M.*  
172 *integrifolia* have genes involved in the cyanogenic glycoside pathway (Nock et al., 2016).  
173 However, cyanogenic glycosides levels are extremely low in the kernel of the commercially  
174 important species *M. integrifolia* and *M. tetraphylla* (Dahler et al., 1995). The high level of  
175 bitterness in the seeds of *M. jansanii* may be associated with high concentrations of cyanogenic  
176 glycosides and large numbers of genes for their biosynthesis found in this study. Knowledge  
177 of these genes will support efforts to avoid their transfer to domesticated *Macadamia* when  
178 using *M. jansanii* as a source of other desirable genes.

179 Plants may produce antimicrobial proteins as part of their defence against microbial attack.  
180 *Macadamia* seed might have antimicrobial proteins that protect them against attack when  
181 germinating in the warm and moist rainforest environment. A new family of antimicrobial  
182 peptides, MiAMP-2, was discovered in the seeds of *M. integrifolia* (Marcus et al., 1999).  
183 Although only a single gene was found in the *M. jansanii* genome, it encoded a protein with  
184 four domains that correspond to the previously reported antimicrobial peptides suggesting that



185 four copies of the peptide could be derived from each translation of this gene. This is the first  
186 report of a gene structure for the macadamia anti-microbial peptide with a single intron. This  
187 gene has potential for wide use as an antimicrobial protein in plant defence.

188 Macadamia oil has a unique composition being 75% fat, 80% of which is monounsaturated  
189 e.g., oleic oil (C18:1) 55-67%, followed by palmitoleic acid (C16:1) 15-22% (Hu et al., 2019a;  
190 Curb et al., 2000; Aquino-Bolaños et al., 2016). The results of analysis of the genes of lipid  
191 metabolism in the *M. jansanii* genome are consistent with this fatty acid profile. The number  
192 of SAD genes which are responsible for conversion of stearyl-ACP (18:0) to oleate (18:1)  
193 was found to be higher in number than the other genes in these pathways and may explain the  
194 desirable high oleic content of macadamias. Retention of these genes will be important in  
195 breeding. This species may provide a source of genes for manipulation of lipids in other food  
196 crops.

197 This rare species has a very small population size explaining the low heterozygosity (Ceballos  
198 et al., 2018). The heterozygosity was less than one third that of the more widespread, *M.*  
199 *integrifolia*, reported to have a heterozygosity of 0.98% (Topp et al., 2019; Nock et al., 2020).  
200 This analysis indicates the importance of conserving the diversity of this endangered species  
201 and retaining the unique alleles that may be useful in breeding. *M. jansanii* is a small tree with  
202 a high kernel recovery and both of these traits are key for macadamia improvement. Sustainable  
203 intensification of production will be facilitated by the breeding of smaller trees and improved  
204 kernel recovery is central to kernel yield. Genome level analysis will support field studies for  
205 the conservation of this species (Shapcott and Powell, 2011) and molecular analysis of diversity  
206 in support of breeding (Mai et al., 2020).

207 The use of *M. jansanii* as a model in testing genome sequencing and assembly methods  
208 (Murigneux et al., 2020; Sharma et al., 2021) is further enhanced by the chromosome level

209 assembly presented here. This is currently the most complete genome sequence available for a  
210 macadamia and any member of the more than 1,660 Proteaceae species (Christenhusz and  
211 Byng, 2016) making a useful contribution to the goal of sequencing plant biodiversity (Lewin  
212 et al., 2018). The Proteaceae belongs to the basal eudicot order Proteales, a sister group to  
213 most eudicots (Chanderbali et al., 2016; Drinnan et al., 1994). Among the basal eudicots there  
214 are few well characterized genomes. Available genomes include; *Aquilegia coerulea*  
215 (Ranunculales) (Filiault et al., 2018), *Papaver somniferum* (Ranunculales) (Pei et al., 2021),  
216 *Nelumbo nucifera* (Proteales) (Ming et al., 2013), *Trochodendron aralioides*  
217 (Trochodendrales) (Strijk et al., 2019), *Tetracentron sinense* (Trochodendrales) (Liu et al.,  
218 2020). The *M. jansanii* genome provides a valuable contribution to comparative genomics in  
219 this group of flowering plants. The chromosome level assembly with an N50 scaffold length  
220 of 58 Mb and 96.9% of BUSCO genes compares favourably with those available for other  
221 endangered species e.g *Acer yangbiense* with N50 45 Mb and 90.5% BUSCO genes (Giordano  
222 et al., 2017), *Ostrya rehderiana* N50 2.31 Mb (Yang et al., 2018) and *Nyssa yunnanensis* with  
223 N50 of 985 Kb and BUSCO score of 90.5% (Weixue et al., 2020).

224

## 225 **Experimental procedures**

### 226 **Plant material**

227 Fresh leaf tissue of *M. jansanii* was collected from *ex-situ* collections of trees at Nambour and  
228 Tiaro (three accessions were from the Maroochy Research Facility, Department of Agriculture  
229 & Fisheries, Nambour, Queensland, Australia, accessions 1005, 1003 and 1002 and five from  
230 Tiaro, Queensland, Australia, Accession #: 1161003, 1161005, 1161001a & 1161001b,  
231 1161004). Fresh leaf tissue (fully expanded young flush) was collected and immediately frozen

232 by placing under dry ice and stored at  $-80^{\circ}\text{C}$  until further processed for DNA and RNA  
233 extraction.

234

### 235 **DNA and RNA isolation**

236 Leaf tissue was coarsely ground under liquid nitrogen using a mortar and pestle and further  
237 ground under cryogenic conditions into a fine powder using a Tissue Lyser (MM400, Retsch,  
238 Germany). All accessions were used for DNA isolation. DNA was extracted as per an  
239 established method (Furtado, 2014) with minor modification where phenol was excluded from  
240 the extraction method. DNA was extracted from 2-3 gm of leaf tissue and dissolved in up to  
241 400  $\mu\text{l}$  of TE buffer.

242 Accession no. 10051 was used for RNA isolation. RNA was extracted as per established  
243 methods (Rubio-Piña and Zapata-Pérez, 2011; Furtado, 2014). RNA was extracted from 2-3  
244 gm of tissue, and treated with extraction buffer, chloroform and phenol/chloroform (1:1) in  
245 different steps, followed by further purification using DNase treatment from the Qiagen's  
246 RNeasy Mini kit). RNA quality and quantity were determined using A260/280 and A260/230  
247 absorbance ratio (Nanodrop, Invitrogen USA) and RNA integrity measurements (Bioanalyser,  
248 Agilent technology, USA).

249

### 250 **Chromosome level assembly**

#### 251 **Chicago library sequencing and Sequencing**

252 DNA was isolated as per an established method (Furtado, 2014). Then the library was prepared  
253 as described in Putnam et al., (2016). Briefly,  $\sim 500\text{ng}$  of HMW gDNA was reconstituted into  
254 chromatin *in vitro* and fixed with formaldehyde. Fixed chromatin was digested with DpnII, the  
255 5' overhangs filled in with biotinylated nucleotides, and then free blunt ends were ligated. After  
256 ligation, crosslinks were reversed, and the DNA was purified from protein. Purified DNA was

257 treated to remove biotin that was not internal to ligated fragments. The DNA was then sheared  
258 to ~350 bp mean fragment size and sequencing libraries were generated using NEBNext Ultra  
259 enzymes and Illumina-compatible adapters. Biotin-containing fragments were isolated using  
260 streptavidin beads before PCR enrichment of each library. The libraries were sequenced on an  
261 Illumina HiSeqX platform to produce 213 million 2x150bp paired end reads, which provided  
262 88.11 x physical coverage of the genome (1-100 kb pairs).

263

### 264 **Dovetail Hi-C library preparation and sequencing**

265 A Dovetail Hi-C library was prepared in a similar manner as described previously (Lieberman-  
266 Aiden et al., 2009). Briefly, for each library, chromatin was fixed in place with formaldehyde  
267 in the nucleus and then extracted. Fixed chromatin was digested with DpnII, the 5' overhangs  
268 filled in with biotinylated nucleotides, and then free blunt ends were ligated. After ligation,  
269 crosslinks were reversed, and the DNA purified from protein. Purified DNA was treated to  
270 remove biotin that was not internal to ligated fragments. The DNA was then sheared to ~350  
271 bp mean fragment size and sequencing libraries were generated using NEBNext Ultra enzymes  
272 and Illumina-compatible adapters. Biotin-containing fragments were isolated using  
273 streptavidin beads before PCR enrichment of each library. The libraries were sequenced on an  
274 Illumina HiSeqX platform to produce 156 million 2x150bp paired end reads, which provided  
275 3,601.74 x physical coverage of the genome (10-10,000 kb pairs).

### 276 **Scaffolding the assembly with HiRise**

277 The input *de novo* assembly, shotgun reads, Chicago library reads, and Dovetail Hi-C library  
278 reads were used as input data for HiRise, a software pipeline designed specifically for using  
279 proximity ligation data to scaffold genome assemblies (Putnam et al, 2016). An iterative  
280 analysis was conducted. First, Shotgun and Chicago library sequences were aligned to the draft

281 input assembly using a modified SNAP read mapper (<http://snap.cs.berkeley.edu>). The  
282 separations of Chicago read pairs mapped within draft scaffolds were analyzed by HiRise to  
283 produce a likelihood model for genomic distance between read pairs, and the model was used  
284 to identify and break putative misjoins, to score prospective joins, and make joins above a  
285 threshold. After aligning and scaffolding Chicago data, Dovetail HiC library sequences were  
286 aligned and scaffolded following the same method. After scaffolding, shotgun sequences were  
287 used to close gaps between contigs.

### 288 **Re-sequencing**

289 To study the genetic diversity within the species, re-sequencing of the seven different  
290 genotypes was performed on the DNBseq platform (Drmanac et al., 2010). The seven  
291 *Macadamia jansonii* samples were selected randomly to represent diversity in the population.  
292 A DNBseq library was prepared as follows. Briefly, genomic DNA (1 $\mu$ g) was randomly  
293 fragmented using a Covaris, magnetic beads were used to select fragments with an average size  
294 of 300-400bp and DNA was quantified using a Qubit fluorometer. The Fragments were  
295 subjected to end-repair and 3' adenylated, adaptors were ligated to the ends of these 3'  
296 adenylated fragments. Then the double stranded products were heat denatured and circularized  
297 by the splint oligo sequence, the single strand circle DNA (ssCir DNA) was formatted as the  
298 final library. the final library was then amplified to make DNA nanoball (DNB) which had  
299 more than 300 copies of each molecule and the DNBs were loaded into the patterned nanoarray.  
300 Finally, pair-end 150 bases reads were generated by combinatorial Probe-Anchor Synthesis  
301 (cPAS) (MGISEQ-2000).

302

### 303 **RNA-sequencing**

304 RNA sequencing was undertaken by Macrogen, South Korea. Total RNA was subjected to  
305 ribosomal RNA depletion (Ribo zero plant) and then sequenced using Illumina Novaseq 600.  
306 Data.

307

### 308 **Genome assembly quality evaluation & Repetitive element evaluation**

309 The completeness of the genome assembly was evaluated by checking the integrity of the  
310 protein coding genes in the Hi-C assembly using Benchmarking Universal Single-Copy  
311 Orthologs (BUSCO) (version v5.0.0) analysis with eudicot odb10 dataset with 2326 genes.

312 Repetitive elements in the Hi-C assembly were identified *de novo* and classified using  
313 RepeatModeler (version 2.0.1). The repeat library obtained from RepeatModeler was used to  
314 identify and mask the repeats in the Hi-C assembly file using RepeatMasker (Version 4.1.0).

315

### 316 **Structural annotation and functional annotation**

317 The prediction of the protein coding genes in the repeat masked genome was carried out using  
318 ab-initio and evidence-based approach. For ab-initio prediction, Dovetail staff used Augustus  
319 (version 2.5.5) (Stanke et al., 2006) and SNAP (version 2006-07-28) (Johnson et al., 2008).

320 For evidence based approach, MAKER (Cantarel et al., 2008) was used. For training the ab-  
321 initio model for *M. jansanii*, coding sequences from *Malus domestica*, *Prunus persica* and  
322 *Arabidopsis thaliana* were used using AUGUSTUS and SNAP. Six rounds of prediction

323 optimization were done with the package provided by AUGUSTUS. To generate the peptide  
324 evidence in Maker pipeline, Swiss-Prot peptide sequences from the UniProt database were  
325 downloaded and used in combination with the protein sequences from *Malus domestica*,

326 *Prunus persica* and *Arabidopsis thaliana*. To assess the quality of the gene prediction AED  
327 scores were generated for each of the predicted genes as part of MAKER pipeline. Only those  
328 genes which were predicted by both SNAP and AUGUSTUS were retained in the final gene

329 set. To generate the intron hints, a bam file was generated by aligning the RNAseq reads to the  
330 genome using the STAR aligner software (version 2.7) and then bam2hints tool was used  
331 within the AUGUSTUS. The predicted genes were further characterized for their putative  
332 function by performing a BLASTx search against nr protein database (All non-redundant  
333 GenBank CDS translations + PDB + SwissProt + PIR+ PRF), as part of annotations undertaken  
334 by Dovetail and also by using OmicsBox Ver 1.3.11 (BioBam Bioinformatics, Spain).

335

### 336 **Gene families**

337 To identify the anti-microbial genes in the genome BLAST homology search was performed  
338 to identify transcripts similar to the *M. integrifolia* antimicrobial cDNA (MiAMP2, GenBank:  
339 AF161884.1) (Marcus et al., 1999). Then sequence alignment was undertaken using Clone  
340 Manager ver 9.0 (SciEd, USA). Multiple Alignment was undertaken using a reference sequence  
341 as indicated in the results and alignment parameter scoring matrix of Mismatch (2) Open Gap  
342 (4) and Extension-Gap (1). Genes involved in the metabolism of cyanogenic glycosides were  
343 identified in the assembly by following a previously described approach (Nock et al., 2016),  
344 using BLASTp (1E-5) and sequence homology. Similarly, genes of fatty acid metabolism were  
345 identified following the same method.

346

### 347 **Heterozygosity and genetic diversity analysis**

348 The basic variant analysis (BVA) was performed using Qiagen CLC Genomics Workbench  
349 21.0.4 (CLC bio, Aarhus, Denmark). BGI short read sequences of six genotypes (1003, 1002,  
350 1161003, 1161005, 1161001a, 1161001b) and Illumina reads of one genotype (1005) of *M.*  
351 *jansenii* were mapped to the reference genome of Dovetail Hi-C assembly of *M. jansenii*  
352 (1005). Before mapping, the low-quality reads were removed from all the seven genotypes

353 using different CLC trimming parameters (0.05 and 0.01) and the best trimmed reads were  
354 selected based upon the Phred score. Then the trimmed reads were mapped against the  
355 reference sequence using three different settings: (1.0 LF, 0.95 SF; 1.0 LF, 0.90 SF and 1.0 LF,  
356 0.85 SF), out of which the best mapping was selected and then it was passed through the BVA  
357 workflow.

358

### 359 **Accession numbers**

360 The genome sequence reads, transcriptome sequences and genome assembly of *M. janseni*  
361 have been deposited under NCBI bioproject PRJNA694456.

362

### 363 **Acknowledgements**

364 This project was funded by the Hort Frontiers Advanced Production Systems Fund as part of  
365 the Hort Frontiers strategic partnership initiative developed by Hort Innovation, with co-  
366 investment from The University of Queensland, and contributions from the Australian  
367 Government. We thank the Research Computing Centre (RCC), University of Queensland for  
368 support and providing high performance computing resources.

369

### 370 **Author contributions**

371 Contributions of authors were as follows: Designed the study and supervised the project: RJH,  
372 AF, BT and MA. Collected sample: MA, BT, AF and PS. Management of germplasm: MA and  
373 BT. DNA and RNA isolation: PS and AF. Data analysis and prepared the figures: PS and AF.  
374 Bioinformatics analysis: PS, AF, VM, JH and AM. Drafted the manuscript: PS, AF, JH and  
375 WT. Data deposition: PS. All authors edited and approved the final manuscript.



376 **Short legends for Supporting Information**

377 Table S1: Size of each scaffold and number of genes per scaffold

378 Table S2: SNP heterozygosity statistics in eight *Macadamia janseni* accessions

379 Table S3: Genetic diversity statistics in eight *Macadamia janseni* accessions

380 Table S4: Genotype-specific polymorphic SNP positions

381 Table S5: Topologically Associated Domains (TADs) analysis summary

382 Table S6: TAD statistics at different resolutions

383 Table S7: Location of fatty acid genes on pseudo-molecules

384 Table S8: Location of cyanogenic genes on pseudo-molecules

385 Figure S1: Linkage density histogram of Hi-C assembly of *M. janseni* genome

386 Figure S2: BLAST2GO sequence similarity search

387 Figure S3: Gene ontology (GO) analysis by BLAST2GO

388 Figure S4: Alignment of the vicilin-like antimicrobial-peptide transcript from *M.*

389 *integrifolia* and *M. janseni*

390 Figure S5: Alignment of anti-microbial CDS sequence of *M. integrifolia* against the *M.*

391 *janseni* transcript sequence

392 Figure S6: Frequency graph of AED scores.

393 **References**

394 Aquino-Bolaños, E. N., Mapel-Velazco, L., Martín-del-Campo, S. T., Chávez-Servia, J. L., Martínez, A. J.  
395 & Verdalet-Guzmán, I. 2016. Fatty acids profile of oil from nine varieties of Macadamia nut.  
396 International Journal of Food Properties, 20(6), pp 1262-1269.

397

398 Cantarel, B. L., Korf, I., Robb, S. M., Parra, G., Ross, E., Moore, B., Holt, C., Sanchez Alvarado, A. &  
399 Yandell, M. 2008. MAKER: an easy-to-use annotation pipeline designed for emerging model  
400 organism genomes. Genome Res, 18(1), pp 188-96.

401

402 Castada, H. Z., Liu, J., Ann Barringer, S. & Huang, X. 2020. Cyanogenesis in Macadamia and Direct  
403 Analysis of Hydrogen Cyanide in Macadamia Flowers, Leaves, Husks, and Nuts Using Selected  
404 Ion Flow Tube-Mass Spectrometry. Foods, 2020, 9, 174.

405

406 Christenhusz, M. J. M. & Byng, J. W. 2016. The number of known plants species in the world and its  
407 annual increase. Phytotaxa, 261(3), pp 201-217.

408

409 Curb, J. D., Wergowske, G., Dobbs, J. C., Abbott, R. D. & Huang, B. 2000. Serum Lipid Effects of a  
410 High-Monounsaturated Fat Diet Based on Macadamia Nuts. Archives of Internal Medicine,  
411 160(8), pp 1154-1158.

412

413 Dahler, J. M., McConchie, C. & Turnbull, C. G. N. 1995. Quantification of Cyanogenic Glycosides in  
414 Seedlings of Three Macadamia (Proteaceae) Species. Australian Journal of Botany, 43(6), pp  
415 619-628.

416

417 Drmanac, R., Sparks, A. B., Callow, M. J., Halpern, A. L., Burns, N. L., Kermani, B. G., Carnevali, P.,  
418 Nazarenko, I., Nilsen, G. B., Yeung, G., Dahl, F., Fernandez, A., Staker, B., Pant, K. P., Baccash,  
419 J., Borcharding, A. P., Brownley, A., Cedeno, R., Chen, L., Chernikoff, D., Cheung, A., Chirita,  
420 R., Curson, B., Ebert, J. C., Hacker, C. R., Hartlage, R., Hauser, B., Huang, S., Jiang, Y.,  
421 Karpinchyk, V., Koenig, M., Kong, C., Landers, T., Le, C., Liu, J., McBride, C. E., Morenzoni, M.,  
422 Morey, R. E., Mutch, K., Perazich, H., Perry, K., Peters, B. A., Peterson, J., Pethiyagoda, C. L.,  
423 Pothuraju, K., Richter, C., Rosenbaum, A. M., Roy, S., Shafto, J., Sharanhovich, U., Shannon,  
424 K. W., Sheppy, C. G., Sun, M., Thakuria, J. V., Tran, A., Vu, D., Zaranek, A. W., Wu, X.,  
425 Drmanac, S., Oliphant, A. R., Banyai, W. C., Martin, B., Ballinger, D. G., Church, G. M. & Reid,  
426 C. A. 2010. Human genome sequencing using unchained base reads on self-assembling DNA  
427 nanoarrays. Science, 327(5961), pp 78-81.

428

429 Filiault, D. L., Ballerini, E. S., Mandáková, T., Aköz, G., Derieg, N. J., Schmutz, J., Jenkins, J., Grimwood,  
430 J., Shu, S., Hayes, R. D., Hellsten, U., Barry, K., Yan, J., Mihaltcheva, S., Karafiátová, M.,  
431 Nizhynska, V., Kramer, E. M., Lysak, M. A., Hodges, S. A. & Nordborg, M. 2018. The Aquilegia  
432 genome provides insight into adaptive radiation and reveals an extraordinarily polymorphic  
433 chromosome with a unique history. eLife, 7(e36426).

434

- 435 Furtado, A. 2014. DNA extraction from vegetative tissue for next-generation sequencing. *Cereal*  
436 *Genomics*. Springer, pp 1-5.  
437
- 438 Giordano, F., Aigrain, L., Quail, M. A., Coupland, P., Bonfield, J. K., Davies, R. M., Tischler, G., Jackson,  
439 D. K., Keane, T. M. & Li, J. J. S. r. 2017. De novo yeast genome assemblies from MinION,  
440 PacBio and MiSeq platforms. *7*(1), pp 1-10.  
441
- 442 Gross, C. & Weston, P. H. J. A. S. B. 1992. *Macadamia janseni* (Proteaceae), a new species from  
443 central Queensland. *5*(6), pp 725-728.  
444
- 445 Hardner, C. 2016. *Macadamia* domestication in Hawai'i. *Genetic Resources and Crop Evolution*,  
446 *63*(8), pp 1411-1430.  
447
- 448 Hayward, G., Nock, C., Shimizu, Y. & Shapcott, A. 2021. A Comprehensive approach to assessing the  
449 future persistence of the endangered rainforest tree, *Macadamia janseni* (Proteaceae) and  
450 the impact of fire. *Australian Journal of Botany* *69*, 285-300.  
451
- 452 Hu, W., Fitzgerald, M., Topp, B., Alam, M. & O'Hare, T. J. 2019a. A review of biological functions,  
453 health benefits, and possible de novo biosynthetic pathway of palmitoleic acid in macadamia  
454 nuts. *Journal of Functional Foods*, *62*(103520).  
455  
456
- 457 Johnson, A. D., Handsaker, R. E., Pulit, S. L., Nizzari, M. M., O'Donnell, C. J. & de Bakker, P. I. 2008.  
458 SNAP: a web-based tool for identification and annotation of proxy SNPs using HapMap.  
459 *Bioinformatics*, *24*(24), pp 2938-9.  
460
- 461 Lieberman-Aiden, E., Van Berkum, N. L., Williams, L., Imakaev, M., Ragoczy, T., Telling, A., Amit, I.,  
462 Lajoie, B. R., Sabo, P. J. & Dorschner, M. O. J. s. 2009. Comprehensive mapping of long-range  
463 interactions reveals folding principles of the human genome. *326*(5950), pp 289-293.  
464
- 465 Liu, P.-L., Zhang, X., Mao, J.-F., Hong, Y.-M., Zhang, R.-G., E, Y., Nie, S., Jia, K., Jiang, C.-K., He, J., Shen,  
466 W., He, Q., Zheng, W., Abbas, S., Jewaria, P. K., Tian, X., Liu, C.-j., Jiang, X., Yin, Y., Liu, B.,  
467 Wang, L., Jin, B., Ma, Y., Qiu, Z., Baluška, F., Šamaj, J., He, X., Niu, S., Xie, J., Xie, L., Xu, H.,  
468 Kong, H., Ge, S., Dixon, R. A., Jiao, Y. & Lin, J. 2020. The Tetracentron genome provides  
469 insight into the early evolution of eudicots and the formation of vessel elements. *Genome*  
470 *Biology*, *21*(1), pp 291.  
471
- 472 Mai, T., Alam, M., Hardner, C., Henry, R. & Topp, B. J. P. 2020. Genetic Structure of Wild Germplasm  
473 of *Macadamia*: Species Assignment, Diversity and Phylogeographic Relationships. *9*(6), pp  
474 714.

475

476 Marcus, J. P., Green, J. L., Goulter, K. C. & Manners, J. M. 1999. A family of antimicrobial peptides is  
477 produced by processing of a 7S globulin protein in *Macadamia integrifolia* kernels. *Plant J.*  
478 1999, *Plant J.* 1999 Sep;19(6)), pp 699-710.

479

480 Mast, A. R., Willis, C. L., Jones, E. H., Downs, K. M. & Weston, P. H. 2008. A smaller *Macadamia* from  
481 a more vagile tribe: inference of phylogenetic relationships, divergence times, and diaspore  
482 evolution in *Macadamia* and relatives (tribe *Macadamieae*; *Proteaceae*). *Am J Bot.* 95(7), pp  
483 843-70.

484

485 Ming, R., VanBuren, R., Liu, Y., Yang, M., Han, Y., Li, L.-T., Zhang, Q., Kim, M.-J., Schatz, M. C.,  
486 Campbell, M., Li, J., Bowers, J. E., Tang, H., Lyons, E., Ferguson, A. A., Narzisi, G., Nelson, D.  
487 R., Blaby-Haas, C. E., Gschwend, A. R., Jiao, Y., Der, J. P., Zeng, F., Han, J., Min, X. J., Hudson,  
488 K. A., Singh, R., Grennan, A. K., Karpowicz, S. J., Watling, J. R., Ito, K., Robinson, S. A., Hudson,  
489 M. E., Yu, Q., Mockler, T. C., Carroll, A., Zheng, Y., Sunkar, R., Jia, R., Chen, N., Arro, J., Wai, C.  
490 M., Wafula, E., Spence, A., Han, Y., Xu, L., Zhang, J., Peery, R., Haus, M. J., Xiong, W., Walsh, J.  
491 A., Wu, J., Wang, M.-L., Zhu, Y. J., Paull, R. E., Britt, A. B., Du, C., Downie, S. R., Schuler, M. A.,  
492 Michael, T. P., Long, S. P., Ort, D. R., William Schopf, J., Gang, D. R., Jiang, N., Yandell, M.,  
493 dePamphilis, C. W., Merchant, S. S., Paterson, A. H., Buchanan, B. B., Li, S. & Shen-Miller, J.  
494 2013. Genome of the long-living sacred lotus (*Nelumbo nucifera* Gaertn.). *Genome Biology*,  
495 14(5), pp R41.

496

497 Murigneux, V., Rai, S. K., Furtado, A., Bruxner, T. J. C., Tian, W., Ye, Q., Wei, H., Yang, B., Harliwong, I.,  
498 Anderson, E., Mao, Q., Drmanac, R., Wang, O., Peters, B. A., Xu, M., Wu, P., Topp, B., Coin, L.  
499 J. M. & Henry, R. J. 2020. Comparison of long read methods for sequencing and assembly of  
500 a plant genome. 2020.03.16.992933.

501

502 Niu, Y.-F., Li, G.-H., Ni, S.-B., He, X.-Y., Zheng, C., Liu, Z.-Y., Gong, L.-D., Kong, G.-H. & Liu, J. 2020.  
503 Genome assembly and annotation of *Macadamia tetraphylla*. *bioRxiv*, 2020.03.11.987057.

504

505 Nock, C. J., Baten, A., Barkla, B. J., Furtado, A., Henry, R. J. & King, G. J. 2016. Genome and  
506 transcriptome sequencing characterises the gene space of *Macadamia integrifolia*  
507 (*Proteaceae*). *BMC Genomics*, 17(1), pp 937.

508

509 Nock, C. J., Baten, A., Mauleon, R., Langdon, K. S., Topp, B., Hardner, C., Furtado, A., Henry, R. J. &  
510 King, G. J. 2020. Chromosome-Scale Assembly and Annotation of the *Macadamia* Genome  
511 G3: Genes|Genomes|Genetics, 10(10), pp 3497.

512

513 Nock, C. J., Hardner, C. M., Montenegro, J. D., Ahmad Termizi, A. A., Hayashi, S., Playford, J.,  
514 Edwards, D. & Batley, J. 2019. Wild Origins of *Macadamia* Domestication Identified Through  
515 Intraspecific Chloroplast Genome Sequencing. *Frontiers in plant science*, 10(334).

516

- 517 O'Connor, K., Hayes, B. & Topp, B. 2018. Prospects for increasing yield in macadamia using  
518 component traits and genomics. *Tree Genetics & Genomes*, 14(1), pp 7.
- 519
- 520 Peace, C. P. 2005. Genetic characterisation of Macadamia with DNA markers. PhD thesis, The  
521 University of Queensland, Brisbane.
- 522
- 523 Peace, C. P., Allan, P., Vithanage, V., Turnbull, C. N. & Carroll, B. J. 2013. Genetic relationships  
524 amongst macadamia varieties grown in South Africa as assessed by RAF markers. *South*  
525 *African Journal of Plant and Soil*, 22(2), pp 71-75.
- 526
- 527 Pei, L., Wang, B., Ye, J., Hu, X., Fu, L., Li, K., Ni, Z., Wang, Z., Wei, Y., Shi, L., Zhang, Y., Bai, X., Jiang,  
528 M., Wang, S., Ma, C., Li, S., Liu, K., Li, W. & Cong, B. 2021. Genome and transcriptome of  
529 *Papaver somniferum* Chinese landrace CHM indicates that massive genome expansion  
530 contributes to high benzyloisoquinoline alkaloid biosynthesis. *Horticulture Research*, 8(1), pp  
531 5.
- 532
- 533 Rost, J., Muralidharan, S., Campbell, D., Mehr, S., CatherineNock & Alice Lee, N. 2016. ASCIA-P19:  
534 Discovery of 7s and 11s globulins as putative allergens in macadamia nut by combining  
535 allergenomics and patient serum ige binding. *Internal Medicine Journal*, 46(S4), pp 10-10.
- 536
- 537 Rost, J., Muralidharan, S. & Lee, N. A. 2020. A label-free shotgun proteomics analysis of macadamia  
538 nut. *Food Research International*, 129(108838).
- 539
- 540 Rubio-Piña, J. A. & Zapata-Pérez, O. J. E. j. o. B. 2011. Isolation of total RNA from tissues rich in  
541 polyphenols and polysaccharides of mangrove plants. 14(5), pp 11-11.
- 542
- 543 Shapcott, A. & Powell, M. J. A. J. o. B. 2011. Demographic structure, genetic diversity and habitat  
544 distribution of the endangered, Australian rainforest tree *Macadamia janseni* help facilitate  
545 an introduction program. 59(3), pp 215-225.
- 546
- 547 Sharma, P., Aldossary, O., Alsubaie, B., Al-Mssallem, I., Nath, O., Mitter, N., Alves Margarido, G. R.,  
548 Topp, B., Murigneux, V., Masouleh, A. K., Furtado, A. & Henry, R. J. 2021. Improvements in  
549 the Sequencing and Assembly of Plant Genomes. *Gigabyte*, 1, 2021.
- 550
- 551 Simão, F. A., Waterhouse, R. M., Ioannidis, P., Kriventseva, E. V. & Zdobnov, E. M. 2015. BUSCO:  
552 assessing genome assembly and annotation completeness with single-copy orthologs.  
553 *Bioinformatics*, 31(19), pp 3210-3212.
- 554
- 555 Solà Marsiñach, M. & Cuenca, A. P. 2019. The impact of sea buckthorn oil fatty acids on human  
556 health. *Lipids in Health and Disease*, 18(1), pp 145.

557

558 Song, I.-B., Gu, H., Han, H.-J., Lee, N.-Y., Cha, J.-Y., Son, Y.-K. & Kwon, J. 2018. Omega-7 inhibits  
559 inflammation and promotes collagen synthesis through SIRT1 activation. *Applied Biological*  
560 *Chemistry*, 61(4), pp 433-439.

561

562 Stanke, M., Keller, O., Gunduz, I., Hayes, A., Waack, S. & Morgenstern, B. 2006. AUGUSTUS: ab initio  
563 prediction of alternative transcripts. *Nucleic Acids Research*, 34(suppl\_2), pp W435-W439.

564

565 Strijk, J. S., Hinsinger, D. D., Zhang, F. & Cao, K. 2019. Trochodendron aralioides, the first  
566 chromosome-level draft genome in Trochodendrales and a valuable resource for basal  
567 eudicot research. *GigaScience*, 8(11).

568

569 Topp, B. L., Nock, C. J., Hardner, C. M., Alam, M. & O'Connor, K. M. 2019. Macadamia (*Macadamia*  
570 *spp.*) Breeding. In: *Advances in Plant Breeding Strategies: Nut and Beverage Crops: Volume*  
571 *4*. Cham: Springer International Publishing, pp. 221–251.

572

573 Weixue, M., Jinpu, W., Ting, Y., Yannan, F., Le, C., Jinlong, Y., Ranchang, M., Jie, L., Jianming, Z.,  
574 Weibang, S., Xun, X., Xin, L., Radoje, D. & Huan, L. 2020. The draft genome assembly of the  
575 critically endangered *Nyssa yunnanensis*, a plant species with extremely small populations  
576 endemic to Yunnan Province, China. *Gigabyte*.

577

578 Yang, Y., Ma, T., Wang, Z., Lu, Z., Li, Y., Fu, C., Chen, X., Zhao, M., Olson, M. S. & Liu, J. 2018. Genomic  
579 effects of population collapse in a critically endangered ironwood tree *Ostrya rehderiana*.  
580 *Nature Communications*, 9(1), pp 5449.

581 **Table 1** *Macadamia janseni* genome sequencing and assembly statistics.

|                        | <b>PacBio</b>             | <b>Dovetail Chicago</b>      | <b>Dovetail Hi-C<br/>assembly</b> |
|------------------------|---------------------------|------------------------------|-----------------------------------|
| Library Statistics     | 3,170,206 reads           | 213M read pairs;<br>2x150 bp | 156M read pairs; 2x 150<br>bp     |
| Coverage               | 84 X                      | 88 X                         | 3,601 X                           |
| <b>Genome assembly</b> |                           |                              |                                   |
| Total Length           | 758.28 Mb                 | 758.30 Mb                    | 758.43 Mb                         |
| L50/N50*               | 135 scaffolds; 1.58<br>Mb | 199 scaffolds; 1.0<br>Mb     | 7 scaffolds; 52.1Mb               |
| L90/N90*               | 457 scaffolds; 0.51<br>Mb | 767 scaffolds; 0.23<br>Mb    | 13 scaffolds; 45.61 Mb            |
| Longest Scaffold       | 10,537,631 bp             | 8,434,305 bp                 | 67,682,215 bp                     |
| Number of<br>Scaffolds | 762                       | 1,529                        | 219                               |
| <b>BUSCO results*</b>  |                           |                              |                                   |
| Single genes           | 79.10%                    | 80.10%                       | 80.80%                            |
| Duplicated genes       | 17.60%                    | 17.10%                       | 16.30%                            |
| Fragmented genes       | 0.90%                     | 1.00%                        | 1.00%                             |
| Missing genes          | 2.00%                     | 2.00%                        | 2.10%                             |

582 \* Eudicots\_odb10 dataset, Number of BUSCOs= 2326.

583

584 **Table 2** Annotation of repeat sequences in the *M. jansanii* genome.

585

|                          |      | Hi-C Assembly |
|--------------------------|------|---------------|
| Total Repetitive content |      | 55.9%         |
| Class I TEs repeats      |      | 29.9%         |
|                          | LTRs | 24%           |
|                          | LINE | 5.67%         |
|                          | SINE | 0%            |
| Class II TEs repeats     |      | 1.56%         |
| Low complexity repeats   |      | 0.33%         |
| Simple repeats           |      | 1.35%         |

586

587



588 **Table 3** Genes predicted in the *M. jansinii* genome

589

| <b>Gene prediction</b>          |               |
|---------------------------------|---------------|
| Total number of genes           | 31,591        |
| Total coding region             | 43,235,907 bp |
| Average length of genes         | 1,368 bp      |
| Number of single-exon genes     | 2,458         |
| Number of genes with annotation | 22,500        |
| Cyanogenic genes                | 82            |
| Fatty acid genes                | 47            |
| Anti-microbial genes            | 1             |

590 **Table 4** Comparison of genome assemblies of three *Macadamia* species.

591

|                          | <i>M. integrifolia</i> (V1) | <i>M. integrifolia</i> (V2) | <i>M. tetraphylla</i> | <i>M. jansanii</i> |
|--------------------------|-----------------------------|-----------------------------|-----------------------|--------------------|
| Assembly length (Mb)     | 518.49                      | 744.64                      | 750.53                | 758.43             |
| N50 (kb)                 | 4.7                         | 413.4                       | 1.2                   | 52.1               |
| No. of contigs/scaffolds | 193,493                     | 4094                        | 4,335                 | 219                |
| Repeats                  | 37.00%                      | 55.00%                      | 61.42%                | 55.90%             |
| BUSCO                    | 77.40%                      | 90.20%                      | 89.72%                | 96.90%             |
| No. of coding genes      | 35,337                      | 34,274                      | 31,571                | 31,591             |

592

593 **Table 5** Heterozygosity and genetic variation in *M. jansanii*

594

| Accession ID | Number of polymorphic sites | Number of Indels | Number of SNP | Variant <sup>1</sup> Positions: Homozygous SNPs | Variant <sup>1</sup> Positions: Heterozygous SNPs | SNP Heterozygosity | Unique <sup>2</sup> Heterozygous variants | Unique <sup>2</sup> Homozygous variants | Total unique <sup>2</sup> polymorphic positions |
|--------------|-----------------------------|------------------|---------------|-------------------------------------------------|---------------------------------------------------|--------------------|-------------------------------------------|-----------------------------------------|-------------------------------------------------|
| 1005*        | 5,418,086                   | 486,846          | 4,764,835     | 4,019                                           | 2,428,956                                         | 0.31               | 2,249,732                                 | 3,070                                   | 2,252,802                                       |
| 1161004      | 5,415,612                   | 377,580          | 4,901,611     | 784,323                                         | 2,038,553                                         | 0.26               | 1,902,705                                 | 111,100                                 | 2,013,805                                       |
| 1161003      | 6,785,189                   | 555,641          | 6,034,679     | 1,047,938                                       | 2,465,089                                         | 0.32               | 2,306,771                                 | 162,541                                 | 2,469,312                                       |
| 1161005      | 6,204,994                   | 531,550          | 5,488,354     | 780,593                                         | 2,347,362                                         | 0.30               | 2,190,169                                 | 85,258                                  | 2,275,427                                       |
| 1161001a     | 6,977,842                   | 574,625          | 6,196,254     | 875,565                                         | 2,649,035                                         | 0.34               | 2,484,209                                 | 109,875                                 | 2,594,084                                       |
| 1003         | 7,050,861                   | 586,001          | 6,254,227     | 891,669                                         | 2,672,103                                         | 0.34               | 2,505,726                                 | 113,837                                 | 2,619,563                                       |
| 1002         | 6,759,260                   | 586,334          | 5,973,425     | 1,044,208                                       | 2,447,418                                         | 0.31               | 2,286,675                                 | 165,048                                 | 2,451,723                                       |
| 1161001b     | 6,704,384                   | 548,292          | 5,962,434     | 824,632                                         | 2,556,695                                         | 0.33               | 2,394,003                                 | 97,027                                  | 2,491,030                                       |

595

596 <sup>1</sup> Relative to reference genome

597 <sup>2</sup> Only found in this individual and not in any of the other 7 genotypes.

598 \* Reference genome

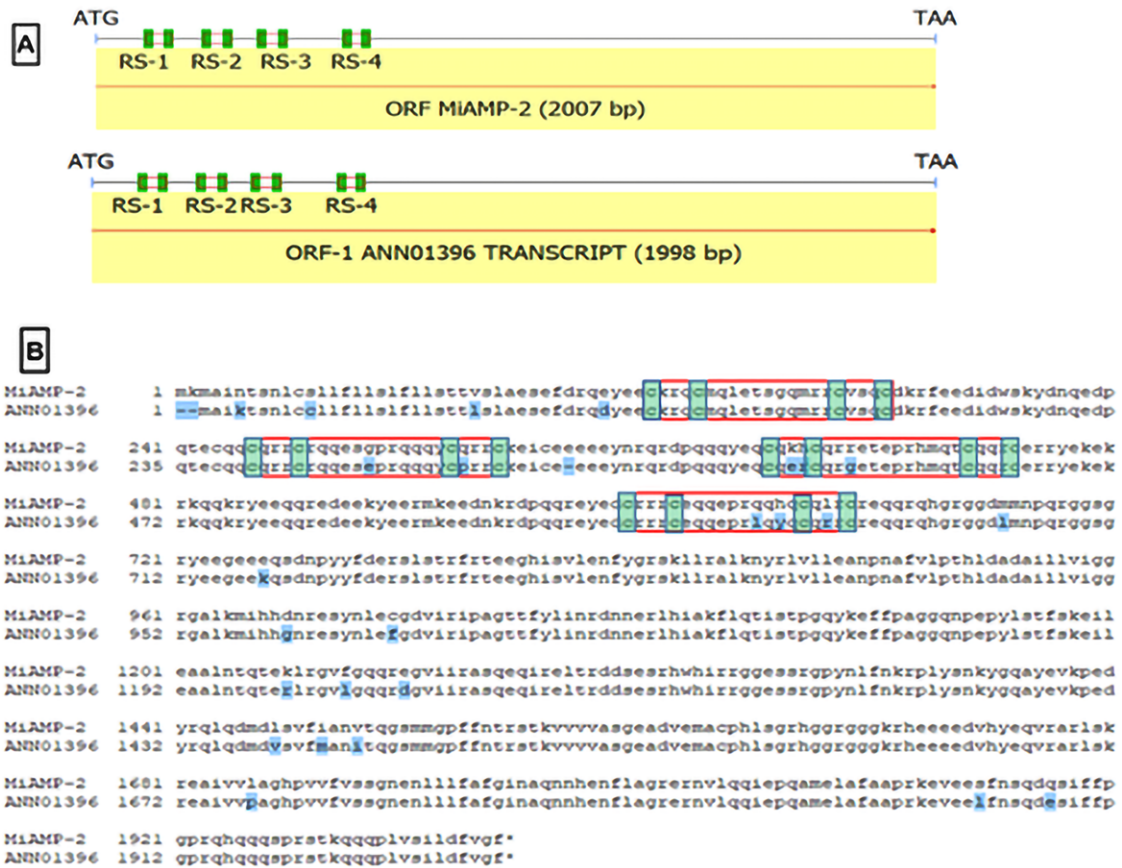

599

600

601 **Figure 1** Anti-microbial peptide structure

602 **Figure 1(A)** is the cDNA sequence of anti-microbial gene of *M. integrifolia* with four repeat  
 603 segments (RS), shown in red open boxes and cysteine residues in green filled boxes aligned  
 604 with *M. jansanii* transcript sequence ANN01396, showing same pattern. Figure 1(B) shows  
 605 the alignment of the anti-microbial peptide sequence from the *M. integrifolia* and *M. jansanii*.  
 606 The first half of the sequence shows the repeat segments within red boxes with green  
 607 highlighted cysteine residues. Differences in amino acid sequence throughout the alignment  
 608 as shown in blue highlighted text.

609

610

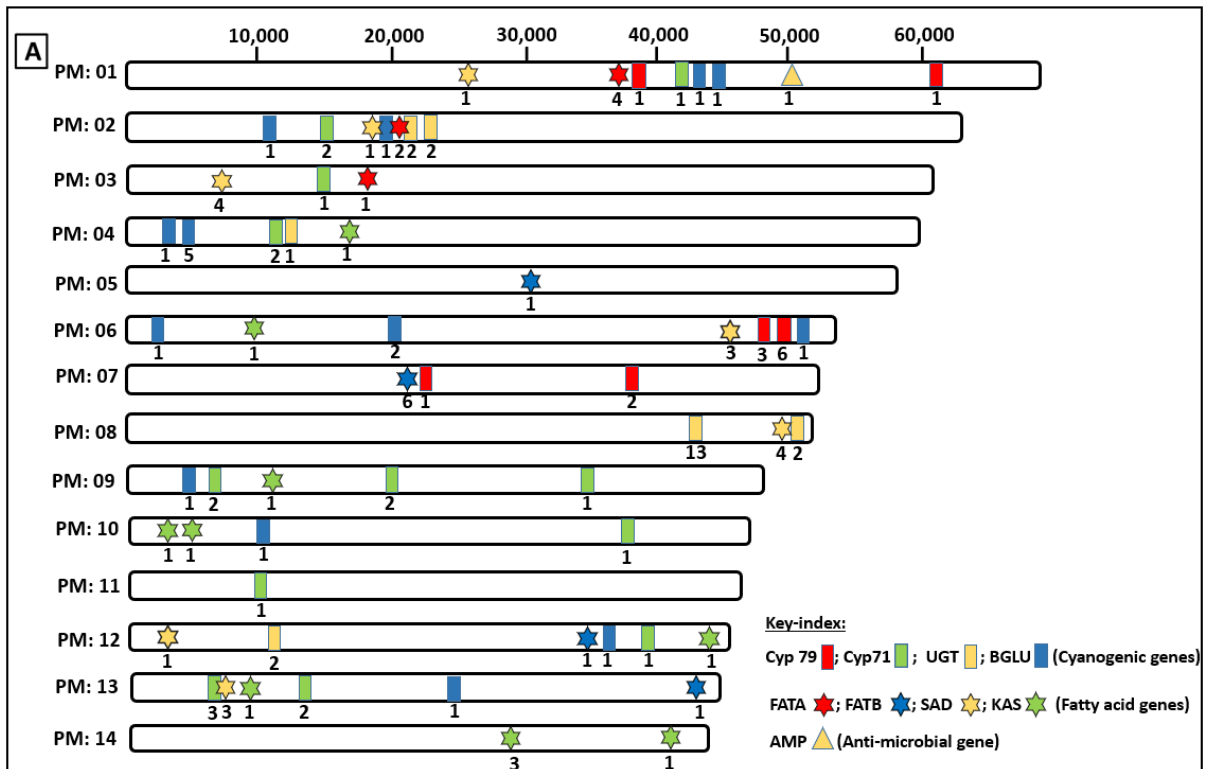

611

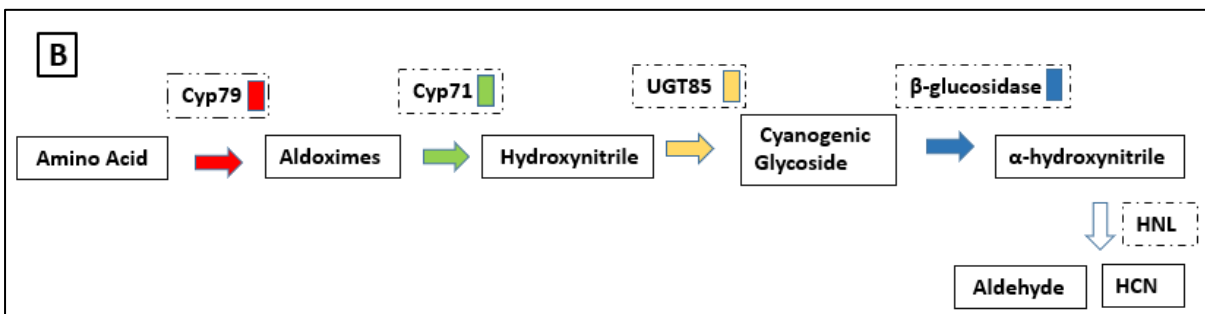

620

612 **Figure 2** Pseudo-chromosomes of *M. jansanii* with location of cyanogenic, fatty acid and  
 613 anti-microbial genes.

614 **Figure 2(A)** putative cyanogenic, fatty acid and anti-microbial gene locations are shown on  
 615 14 pseudo molecules of *M. jansanii*. The bars show the cyanogenic genes, the stars show the  
 616 genes involved in fatty acid pathway and the triangle shows the antimicrobial gene location  
 617 on the pseudo-chromosome, the color key-index is given along with the figure. Pseudo-  
 618 chromosomes are not to scale. **Figure 2(B)** illustrates the cyanogenic pathway and the main  
 619 enzymes involved.
